# Supplementary material for: Analysis of the glyco-code in pancreatic ductal adenocarcinoma identifies glycan-mediated immune regulatory circuits
Source: PubMed Central journal article supplement (PMC8752754; doi:10.1038/s42003-021-02934-0), 2022-01-11
Supplement: 42003_2021_2934_MOESM3_ESM.pdf [file 42003_2021_2934_MOESM3_ESM.pdf]

## Description of Additional Supplementary Files

**File name:** Supplementary Data

**Description:** Raw data of the experimental results shown in the manuscript.
